# Supplementary material
Source: PubMed Central journal article supplement (PMC5686588)
Supplement: JB.00275-17_zjb999094583s1.pdf [file JB.00275-17_zjb999094583s1.pdf]

**Supplemental material 1. Alignments of crRNA sequences.** Some reads may contain additional nucleotides (C, A) or dinucleotides (CC, CA) on their 3' ends, which are artifacts resulted from sequencing method used.

**Repeat alignment**

```
>2103996 TGCCAACCCGGGAGATTTCAATT-----
>2102875 GGTACGAGTTTGCAGATTTCAATT-----
>2103203 -CCCTTTTGCCGTAAATTTCAATTG-----
>2103995 -ACCCAACCCGGGAGATTTCAATTG-----
>2103798 -ACATATAGAGAATCATTTC AATTG-----
>2103994a --CCCAACCCGGGAGATTTCAATTGC-----
>2103994b --CCCAACCCGGGAGATTTCAATTGC-----
>2103601a --ATTTCTTTTATAGATTTCAATTGC-----
>2103073 --TACCGACTGAAAAATTTCAATTGC-----
>2103601b --ATTTCTTTTATAGATTTCAATTGC-----
>2103796 ---ATATAGAGAATCATTTC AATTGCA-----
>2103993c ---CCAACCCGGGAGATTTCAATTGCA-----
>2103993a ---CCAACCCGGGAGCTTTCAATTGCA-----
>2103993b ---CCAACCCGGGAGATTTCAATTGCA-----
>2103072b ---ACCGACTGAAAAATTTCAATTGCA-----
>2103072 ---ACCGACTGAAAAATTTCAATTGCA-----
>2103072a ---ACCGACTGAAAAATTTCAATTGCA-----
>2103992a ----CAACCCGGGAGATTTCAATTGCAC-----
>2103992b ----CAACCCGGGAGATTTCAATTGCAC-----
>2103599 ----TTCTTTTATAGATTTCAATTGCAC-----
>2103598 ----TCTTTTATAGATTTCAATTGCACC-----
>2103991a ----AACCCGGGAGATTTCAATTGCACC-----
>2103991b ----AACCCGGGAGATTTCAATTGCACC-----
>2103597 ----CTTTTATAGATTTCAATTGCACCA-----
>2103265 ----GTAAAAATGATTTCAATTGCACCA-----
>2103990b ----ACCCGGGAGATTTCAATTGCACCA-----
>2103990c ----ACCCGGGAGATTTCAATTGCACCA-----
>2103990a ----ACCCGGGAGATTTCAATTGCACCA-----
>2103330 ----TTCTTTCTTATTTCAATTGCACCA-----
>2103727 ----CCATCTGTATTTCAATTGCACCA-----
>2103925 ----CTCTATCATATTTCAATTGCACCA-----
>2103002 ----ACTACTTCATTTCAATTGCACCAT-----
>2103923 ----CTATCATATTTCAATTGCACCATA-----
>2103328 ----CTTTCTTATTTCAATTGCACCATA-----
>2103461 ----TTCTGTAATTTCAATTGCACCATA-----
>2103725 ----ATCTTGATTTCAATTGCACCATA-----
>2102867 ----TTTGAGATTTCAATTGCACCATA-----
>2103659 ----TGTAAATTTCAATTGCACCATAC-----
>2103527 ----GATTTAATTTCAATTGCACCATAC-----
>2103724 ----TCTTGATTTCAATTGCACCATAC-----
>2103723 ----CTTGATTTCAATTGCACCATACA-----
>2103921 ----ATCATATTTCAATTGCACCATACA-----
>2103459 ----CGTAAATTTCAATTGCACCATACA-----
>2103194a ----CGTAAATTTCAATTGCACCATACA-----
>2103194b ----CGTAAATTTCAATTGCACCATACA-----
>2104051 ----AACGGATTTCAATTGCACCATACA-----
>2103855 ----ACGCTATTTCAATTGCACCATACA-----
>2103392a ----CATTAATTTCAATTGCACCATACA-----
>2102798 ----ACCTAATTTCAATTGCACCATACA-----
>2103392b ----CATTAATTTCAATTGCACCATACA-----
>2103920 ----TCATATTTCAATTGCACCATACAG-----
>2103722a ----TTGTATTTCAATTGCACCATACAG-----
>2103722b ----TTGTATTTCAATTGCACCATACAG-----
>2102797 ----CCTAATTTCAATTGCACCATACAG-----
>2103525 ----TTTAATTTCAATTGCACCATACAG-----
>2102732 ----TATTATTTCAATTGCACCATACAG-----
>2103657 ----CTAAATTTCAATTGCACCATACAG-----
>2104050a ----ACGGATTTCAATTGCACCATACAG-----
>2104050b ----ACGGATTTCAATTGCACCATACAG-----
>2103592 ----ATAGATTTCAATTGCACCATACAG-----
>2103458 ----GTAATTTCAATTGCACCATACAG-----
>2103854 ----CGCTATTTAAATTGCACCATACAG-----
```

>2102864 -----GCAGATTTCAATTGCACCATACAG-----  
>2103128 -----CGTTATTTCAATTGCACCATACAG-----  
>2103919 -----CATATTTCAATTGCACCATACACC-----  
>2102601 -----ATCATTTCAATTGCACCATACAGG-----  
>2103787 -----ATCATTTCAATTGCACCATACAGG-----  
>2103259 -----ATGATTTCAATTGCACCATACAGG-----  
>2103457 -----TAAATTTCAATTGCACCATACAGG-----  
>2103591a -----TAGATTTCAATTGCACCATACAGG-----  
>2103591b -----TAGATTTCAATTGCACCATACAGG-----  
>2102930 -----GCTATTTCAATTGCACCATACAGG-----  
>2103853 -----GCTATTTCAATTGCACCATACAGG-----  
>2103127 -----GTTATTTCAATTGCACCATACAGG-----  
>2104049a -----CGGATTTCAATTGCACCATACAGG-----  
>2104049b -----CGGATTTCAATTGCACCATACAGG-----  
>2104048a -----GGATTTCAATTGCACCATACAGGA-----  
>2104048b -----GGATTTCAATTGCACCATACAGGA-----  
>2104048c -----GGATTTCAATTGCACCATACAGGA-----  
>2104048e -----GGATTTCAATTGCACCATACAGGA-----  
>2104048d -----GGATTTCAATTGCACCATACAGGC-----  
>2104048f -----GGCTTTCAATTGCACCATACAGGC-----  
>2104048g -----GGATTTCAATTGCACCATACAGAC-----  
>2103062 -----AAATTTCAATTGCACCATACAGGC-----  
>2103918b -----ATATTTCAATTGCACCATACAGGA-----  
>2103983 -----AGATTTCAATTGCACCATACAGGA-----  
>2102730 -----TTATTTCAATTGCACCATACAGGA-----  
>2103786 -----TCATTTCAATTGCACCATACAGGA-----  
>2102996 -----TCATTTCAATTGCACCATACAGGA-----  
>2102600 -----TCATTTCAATTGCACCATACAGGA-----  
>2103389 -----TAATTTCAATTGCACCATACAGGA-----  
>2103126 -----TTATTTCAATTGCACCATACAGGA-----  
>2103918c -----ATATTTCAATTGCACCATACAGGA-----  
>2103456 -----AAATTTCAATTGCACCATACAGGA-----  
>2103655 -----AAATTTCAATTGCACCATACAGGA-----  
>2103918a -----ATATTTCAATTGCACCATACAGGA-----  
>2103917 -----TATTTCAATTGCACCATACAGGAC-----  
>2103125 -----TATTTCAATTGCACCATACAGGAC-----  
>2103322 -----TATTTCAATTGCACCATACAGGAC-----  
>2102928 -----TATTTCAATTGCACCATACAGGAC-----  
>2102861 -----GATTTCAATTGCACCATACAGGAC-----  
>2103257 -----GATTTCAATTGCACCATACAGGAC-----  
>2103589b -----GATTTCAATTGCACCATACAGGAC-----  
>2103982 -----GATTTCAATTGCACCATACAGGAC-----  
>2103589a -----GATTTCAATTGCACCATACAGGAC-----  
>2104047 -----GATTTCAATTGCACCATACAGGCC-----  
>2103785 -----CATTTCAATTGCACCATACAGGAC-----  
>2103061 -----AATTTCAATTGCACCATACAGGAC-----  
>2103190 -----AATTTCAATTGCACCATACAGGAC-----  
>2103654 -----AATTTCAATTGCACCATACAGGAC-----  
>2103455 -----AATTTCAATTGCACCATACAGGAC-----  
>2103522 -----AATTTTCAATTGCACCATACAGGAC-----  
>2102664 -----TATTTCAATTGCACCATACAGGAC-----  
>2103588 -----ATTTCAATTGCACCATACAGGACA-----  
>2103060 -----ATTTCAATTGCACCATACAGGACA-----  
>2102994 -----ATTTCAATTGCACCATACAGGACA-----  
>2103124b -----ATTTCAATTGCACCATACAGGACA-----  
>2102728b -----ATTTCAATTGCACCATACAGGACC-----  
>2103916 -----ATTTCAATTGCACCATACAGGACC-----  
>2104046 -----ATTTCAATTGCACCATACAGGACC-----  
>2102532 -----ATTTCAATTGCACCATACAGGACC-----  
>2103981 -----ATTTCAATTGCACCATACAGGACC-----  
>2102793 -----ATTTCAATTGCACCATACAGGACC-----  
>2103784 -----ATTTCAATTGCACCATACAGGACC-----  
>2103454 -----ATTTCAATTGCACCATACAGGACC-----  
>2103387 -----ATTTCAATTGCACCATACAGGACC-----  
>2103653 -----ATTTCAATTGCACCATACAGGACC-----  
>2103256 -----ATTTCAATTGCACCATACAGGACC-----  
>2102927 -----ATTTCAATTGCACCATACAGGACC-----  
>2103189 -----ATTTCAATTGCACCATACAGGACC-----

```

>2103521 -----ATTTCAATTGCACCATACAGGACC-----
>2102598 -----ATTTCAATTGCACCATACAGGACA-----
>2102663 -----ATTTCAATTGCACCATACAGGACA-----
>2103718 -----ATTTCAATTGCACCATACAGGACA-----
>2102728a -----ATTTCAATTGCACCATACAGGACA-----
>2103321 -----ATTTCAATTGCACCATACAGGACA-----
>2102860 -----ATTTCAATTGCACCATACAGGACA-----
>repeat -----ATTTCAATTGCACCATACAGGAATTA AAC
>2103850 -----ATTTCAATTGCACCATACAGGAAC-----
>2103124a -----ATTTCAATTGCACCATACAGGAAC-----
>2103980 -----TTTCAATTGCACCATACAGGAACA-----
>2102531 -----TTTCAATTGCACCATACAGGAACC-----

```

**Spacer1 alignment**

```

>spacer1 CCAATTCCTCAAAGCCGTGCTGCCCAACCCGGGAG
>2104005SP1 -----AAGCCGTGCTGCCCAACCCGGGAG

```

**Spacer2 alignment**

```

>2103956SP2 AAAACGTATCGGTGAGCGCGAGTC-----
>spacer2 -----GTATCGGTGAGCGGAGTCTATCTCCTCTATCAT-----
>2103947SP2 -----CGGTGAGCGCGAGTCTATCTCCT-----
>2103946SP2 -----GGTGAGCGCGAGTCTATCTCCT-----
>2103941SP2 -----GCGCGAGTCTATCTCCTCTATCA-----
>2103938SP2 -----CGAGTCTATCTCCTCTATCATAT-----
>2103936aSP2 -----AGTCTATCTCCTCTATCATATTT-----
>2103936bSP2 -----AGTCTATCTCCTCTATCATATTT-----
>2103936cSP2 -----AGTCATATCTCCTCTATCATATTT-----
>2103935aSP2 -----GTCCTATCTCCTCTATCATATTT-----
>2103935bSP2 -----GTCCTATCTCCTCTATCATATTT-----
>2103934cSP2 -----TCCTATCTCCTCTATCATATTTCA-----
>2103934aSP2 -----TCCTATCTCCTCTATCATATTTCA-----
>2103934bSP2 -----TCCTATCTCCTCTATCATATTTCA-----
>2103930aSP2 -----ATCTCCTCTATCATATTTCAATTG-----
>2103930bSP2 -----ATCTCCTCTATCATATTTCAATTG-----
>2103930cSP2 -----ATCTCCTCTATCATATTTCAATTG-----
>2103929cSP2 -----TCTCCTCTATCATATTTCAATTGC-----
>2103929bSP2 -----TCTCCTCTATCATATTTCAATTGC-----
>2103929aSP2 -----TCTCCTCTATCATATTTCAATTGC-----

```

**Spacer3 alignment**

```

>2103893SP3 TTAAAACGCTTTTCGAACGCTACG-----
>2103891SP3 --AAAACGCTTTTCGACCGCTACGAG-----
>2103890SP3 ---AAACGCTTTTCGAACGCTACGAGA-----
>2103887aSP3 -----CGCTTTTCGAACGCTACGAGATAG-----
>2103887bSP3 -----CGCTTTTCGAACGCTACGAGATAG-----
>2103887cSP3 -----CGATTTTCGAACGCTACGAGATAG-----
>2103886aSP3 -----GCTTTTCGAACGCTACGAGATAGA-----
>2103886bSP3 -----GCTTTTCGAACGCTACGAGATAGA-----
>spacer3 -----GCTTTTCGAACGCTACGAGATAGACCGAAATACGCT-----
>2103882SP3 -----TTCGAACGCTACGAGATAGACCGA-----
>2103877SP3 -----ACGCTACGAGATAGACCGAAATAC-----
>2103876SP3 -----CGCTACGAGATAGACCGAAATACG-----
>2103875aSP3 -----GCTACGAGATAGACCGAAATACGC-----
>2103875bSP3 -----GCTACGAGATAGACCGAAATACGC-----
>2103874SP3 -----CTACGAGATAGACCGAAATACGCT-----
>2103872SP3 -----ACGAGATAGACCGAAATACGCTAT-----
>2103871SP3 -----CGAGATAGACCGAAATACGCTATT-----
>2103868SP3 -----GATAGACCGAAATACGCTATTTCA-----
>2103867SP3 -----ATAGACCGAAATACGCTATTTCAA-----
>2103864SP3 -----GACCGAAATACGCTATTTCAATTG-----
>2103863SP3 -----ACCGAAATACGCTATTTCAATTGC-----

```

**Spacer4 alignment**

```

>2103827SP4      TTAAAACCTTTCAGCATTGTATTGA-----
>2103821cSP4    -----CTTTCAGCATTGTATTGAACTGAA-----
>2103821dSP4    -----CTTTCAGCATTGTATTGAACTGAA-----
>2103821bSP4    -----CTTTCAGCATTGTATTGAACTGAA-----
>2103821aSP4    -----CTTTCAGCATTGTATTGAACTGAA-----
>2103820aSP4    -----TTTCAGCATTGTATTGAACTGAAC-----
>2103820bSP4    -----TTTCAGCATTGTATTGAACTGAAC-----
>spacer4        -----TTTCAGCATTGTATTGAACTGAACATATAGAGAATC
>2103814SP4    -----CATTGTATTGAACTGAACATATAG-----
>2103808SP4    -----ATTGAACTGAACATATAGAGAATC

```

**Spacer5 alignment**

```

>spacer5        AAAGTTTTAAGATTAGCAAACATTTTACCATCTTGT
>2103746SP5    -----AAGATTAGCAAACATTTTACCATT-----

```

**Spacer6 alignment**

```

>2103689SP6    CTTTACTACATTGAAAAAATCGTC-----
>spacer6        -TTTACTACATTGAAAAAATCGTCTTCGTCTGCTAA-----
>2103678SP6    -----TGAAAAAATCGTCTTCGTCTGCTA-----
>2103673SP6    -----AAATCGTCTTCGTCTGCTAAATTT--
>2103671aSP6    -----ATCGTCTTCGTCTGCTAAATTTCA
>2103671bSP6    -----ATCGTCTTCGTCTGCTAAATTTCA

```

**Spacer7 alignment**

No reads detected.

**Spacer8 alignment**

```

>2103560SP8    ACGTATCCGCACTTCATTTGATAC-----
>2103559bSP8    -CGTATCCGCACTTCATTTGATACT-----
>2103559aSP8    -CGTATCCGCACTTCATTTGATACT-----
>spacer8        --GTATCCGCACTTCATTTGATACTGTCTGATTGATTTA--
>2103558SP8    --GTATCCGCACTTCATTTGATACTG-----
>2103557SP8    ---TATCCGCACTTCATTTGATACTGT-----
>2103556SP8    ----ATCCGCACTTCATTTGATACTGTC-----
>2103555SP8    -----TCCGCACTTCATTTGATACTGTCT-----
>2103554SP8    -----CCGCACTTCATTTGATACTGTCTG-----
>2103543SP8    -----TTGATACTGTCTGATTGATTTAAT

```

**Spacer9 alignment**

```

>2103493SP9    ACAAACCTGCACTATAGTATCATC-----
>2103492SP9    -CAAACCTGCACTATAGTATCATCG-----
>2103491SP9    --AAAACCTGCACTATAGTATCATCGT-----
>spacer9        --AAAACCTGCACTATAGTATCATCGTTAGATATTCGTAA-----
>2103490aSP9    ---AAACTGCACTATAGTATCATCGTT-----
>2103490bSP9    ---AAACTGCACTATAGTATCATCGTT-----
>2103487aSP9    -----CTGCACATAGTATCATCGTTAGA-----
>2103487bSP9    -----CTGCACATAGTATCATCGTTAGA-----
>2103485SP9    -----GCACATAGTATCATCGTTAGATA-----
>2103484SP9    -----CACTATAGTATCATCGTTAGATAT-----
>2103483SP9    -----ACTATAGTATCATCGTTAGATATT-----
>2103480SP9    -----ATAGTATCATCGTTAGATATTCGT-----
>2103478SP9    -----AGTATCATCGTTAGATATTCGTAA-----
>2103475SP9    -----ATCATCGTTAGATATTCGTAAATT-----
>2103473SP9    -----AATCGTTAGATATTCGTAAATTTTC-----
>2103469SP9    -----GTTAGATATTCGTAAATTTCAATT

```

**Spacer10 alignment**

```

>2103233SP10   TTAAAACGATTTTTCCATTAGGTA-----
>2103230SP10   ---AAACGATTTTTCCATTAGGTATCT-----
>2103736SP10   -----AACATTTTACCATCTTGTATTTCA-----
>2103227SP10   -----CGATTTTTCCATTAGGTATCTAAA-----
>2103424bSP10   -----AAGTTTACCATCATCAGTATACCA-----
>2103424aSP10   -----AAGTTTACCATCATCAGTATACCA-----
>spacer10      -----AAGTTTACCATCATCAGTATACCATTTGTGAACATTA
>2103226SP10   -----GATTTTTCCATCAGGTATCTAAAC-----
>2103423SP10   -----AGTTTACCATCATCAGTATACCAT-----

```

**Spacer11 alignment**

No reads detected.

**Spacer12 alignment**

```
>2103293SP12      ACTTAGACTGTCGGTTTCGGCATC-----
>2103291SP12      --TTAGACTGTCGGTTTCGGTATCCA-----
>spacer12         ---TTAGACTGTCGGTTTCGGCATCCATTGTAAAAATG
>2103286SP12      -----CTGTCGGTTTCGGCATCCATTGTA-----
>2103280SP12      -----GTTTCGGCATCCATTGTAAAAATG
```

**Spacer13 alignment**

No reads detected.

**Spacer14 alignment**

```
>2103162aSP14     AACATGCCCCAATTATCTTGGCGC-----
>2103162bSP14     AACATGCCCCAATTATCTTGGCGC-----
>2103161SP14      -ACATGCCCCAATTATCTTGGCGCA-----
>2103160SP14      --CATGCCCCAATTATCTTGGCGCAC-----
>2103159bSP14     ---ATGCCCCAATTATCTTGGCGCAC-----
>2103159aSP14     ---ATGCCCCAATTATCTTGGCGCAC-----
>spacer14         ---ATGCCCCAATTATCTTGGCGCACATAAAATGCGTT---
>2103158SP14     ---TGCCCCAATTATCTTGGCGCACAT-----
>2103156SP14     -----CCCCAATTATCTTGGCGCACATA-----
>2103148SP14     -----ATCTTGGCGCACATAAAATGCGTT---
>2103147SP14     -----TCTTGGCGCACATAAAATGCGTTA--
>2103146SP14     -----CTTGGCGCACATAAAATGCGTTAT-
>2103145bSP14     -----TTGGCGCACATAAAATGCGTTATT-
>2103145cSP14     -----TTGGCGCACATAAAATGCGTTATT-
>2103145aSP14     -----TTGGCGCACATAAAATGCGTTATT
```

**Spacer15 alignment**

```
>2103101SP15     TTAAAACGAAATAAAAAGTAGTTT-----
>2103099SP15     --AAAACGAAATAAAAAGTAGTTTTC-----
>2103096SP15     ---ACGAAATAAAAAGTAGTTTTCGCT-----
>spacer15         -----GAAATAAAAAGTAGTTTTCGCTACCGACTGAAAA-----
>2103085SP15     -----AGTAGTTTTCGCTACCGACTGAAA-----
>2103079SP15     -----TTTCGCTACCGACTGAAAAATTTTC--
>2103077SP15     -----TCGCTACCGACTGAAAAATTTCAA
```

**Spacer16 alignment**

```
>2103031SP16     CGAAGAAGCGTTCTCGGTAGCGAG-----
>spacer16         ---GAAGAAGCGTTCTCGGTAGCGAGCGAGAACTACTTC-----
>2103025SP16     -----AGCGTTCTCGGTAGCGAGCGAGAA-----
>2103019SP16     -----CTCGGTAGCTAGCGAGAACTACTT-----
>2103015SP16     -----GTAGCGAGCGAGAACTACTTCATT-----
>2103010SP16     -----GAGCGAGAACTACTTCATTTCAAT---
>2103007SP16     -----CGAGAACTACTTCATTTCAATTGC
```

**Spacer17 alignment**

```
>2102971SP17     TTAAAACGCCATTTCCCTCGTAGT-----
>2102970SP17     -TAAAACGCCATTTCCCTCGTAGTA-----
>2102967SP17     ----AACGCCATTTCCCTCGTAGTACAA-----
>2102965aSP17     -----CGCCATTTCCCTCGTAGTACTCAT-----
>2102965bSP17     -----CGCCATTTCCCTCGTAGTACTCAT-----
>spacer17         -----GCCATTTCCCTCGTAGTACTCATCGAGGGTTATAGCT
```

**Spacer18 alignment**

```
>2102904SP18 TTAAAACGAAGCCAAGCCTGCAGT-----
>2102901SP18 ---AAACGAAGCCAAGCCTGCAGTGGA-----
>2102900aSP18 ----AACGAAGCCAAGCCTGCAGTGGAT-----
>2102900bSP18 ----AACGAAGCCAAGCCTGCAGTGGAT-----
>2102899aSP18 ----ACGAAGCCAAGCCTGCAGTGGATA-----
>2102899bSP18 ----ACGAAGCCAAGCCTGCAGTGGATA-----
>2102898cSP18 ----CGAAGCCAAGCCTGCAGTGGATAG-----
>2102898bSP18 ----CGAAGCCAAGCCTGCAGTGGATAG-----
>2102898aSP18 ----CGAAGCCAAGCCTGCAGTGGATAG-----
>2102898dSP18 ----CGAAGCCAAGCCTGCAGTGGATAG-----
>2102898eSP18 ----CGAAGCCAAGCCTGCAGTGGATAG-----
>2102897cSP18 ----GAAGCCAAGCCTGCAGTGGAGAGG-----
>2102897aSP18 ----GAAGCCAAGCCTGCAGTGGATAGG-----
>2102897bSP18 ----GAAGCCAAGCCTGCAGTGGATAGG-----
>spacer18 -----GAAGCCAAGCCTGCAGTGGATAGGTACGAGTTTGCAG--
>2102896aSP18 ----AAGCCAAGCCTGCAGTGGATAGGT-----
>2102896bSP18 ----AAGCCAAGCCTGCAGTGGATAGGT-----
>2102890SP18 ----AGCCTGCAGTGGATAGGTACGAGT-----
>2102889SP18 ----GCCTGCAGTGGATAGGTACGAGTT-----
>2102882SP18 ----GTGGATAGGTACGAGTTTGCAGAT
```

**Spacer19 alignment**

```
>2102835SP19 AAAACAGTATATTACGGCGAACAC-----
>2102831SP19 ----CAGTATATTACGGCGAACACCTCT-----
>spacer19 -----AGTATATTACGGCGAACACCTCTATTTTACTAACCTA
>2102822aSP19 ----ACGGCGAACACCTCTATTTTACTA-----
>2102822bSP19 ----ACGGCGAACACCTCTATTTTACTA-----
>2102817aSP19 ----GAACACCTCTATTTTACTAACCTA-----
>2102817bSP19 ----GAACACCTCTATTTTACTAACCTA
```

**Spacer20 alignment**

```
>spacer20 AAAGTACATATAGGATTTTCCCAATCTGCTTTATT-----
>2102754SP20 ----ATAGGATTTTCCCAATCTGCTTTA-----
>2102743SP2 ----CCAATCTGCTTTATTATTATTTCAATT
```

**Spacer21 alignment**

```
>2102700SP21 ACATCAGCCTCTCCGGCGACTTCA-----
>2102699SP21 -CATCAGCCTCTCCGGCGACTTCAC-----
>spacer21 -----ATCAGCCTCTCCGGCGACTTCACGCTGTCTTTTT
>2102697SP21 ---TCAGCCTCTCCGGCGACTTCACGC-----
>2102692SP21 ----CTCTCCGGCGACTTCACGCTGTCTG-----
```

**Spacer22 alignment**

```
>2102633SP22 CGCCTTTATGCTCGACGACGCAGA-----
>spacer22 CGCCTTTATGCTCGACGACGCAGACGAATCGGATC
>2102628SP22 ----TTATGCTCGACGACGCAGACGACC-----
>2102627SP22 ----TATGCTCGACGACGCAGACGAATC-----
>2102623SP22 ----CTCGACGACGCAGACGAATCGGTT-
```

**Spacer23 alignment**

```
>spacer23 GCTTTGGCTGCGAATTCCTTACGGGCCAATCGAAG
>2102564SP23 ----TGGCTGCGAATTCCTTACGGGCC-----
```
